# Supplementary material for: SLIMMER: a randomised controlled trial of diabetes prevention in Dutch primary health care: design and methods for process, effect, and economic evaluation
Source: PubMed Central journal article supplement (PMC4067380; doi:10.1186/1471-2458-14-602), 2014-06-14
Supplement: 1471-2458-14-602-S2.pdf [file 1471-2458-14-602-S2.pdf]

ADDITIONAL FILE 2. Overview of indicators, methods, and time points of data collection

| Outcomes           | Indicators                                                                                  | Method                                 | Time points   |                |                |
|--------------------|---------------------------------------------------------------------------------------------|----------------------------------------|---------------|----------------|----------------|
|                    |                                                                                             |                                        | Baseline (T0) | 12 months (T1) | 18 months (T2) |
| Socio-demographics | Age, gender, education, ethnic background,                                                  | Participant questionnaire [31]         | X             |                |                |
|                    | Non-response data (age, gender, education, perceived health, reason for non-participation,) | Non-response survey [31]               | X             |                |                |
|                    | Marital status, job status, smoking                                                         | Participant questionnaire [31]         | X             | X              | X              |
|                    | Family history of diabetes                                                                  | Participant questionnaire [25]         | X             | X              | X              |
|                    | Disease history                                                                             | Participant questionnaire [32]         | X             | X              | X              |
| Overall            | Quality of life                                                                             | SF-36 questionnaire [33, 34]           | X             | X              | X              |
| Long-term          | Fasting and 2h insulin, fasting and 2h glucose, HbA1c, HOMA index                           | Oral Glucose Tolerance Test (OGTT)     | X             | X              | X              |
|                    | Cholesterol (total, HDL, LDL), triglycerides                                                | Oral Glucose Tolerance Test (OGTT)     | X             | X              | X              |
|                    | Body weight, height, Body mass index (BMI), waist and hip circumference                     | Anthropometry                          | X             | X              | X              |
|                    | Body fat percentage                                                                         | Bio-impedance analysis (Tanita BC-418) | X             | X              | X              |

Duijzer, G. *et al.* SLIMMER: A randomised controlled trial of diabetes prevention in Dutch primary health care: design and methods for process, effect, and economic evaluation

|              |                                                                                                                                                                                                                                                                            |                                              |   |   |   |
|--------------|----------------------------------------------------------------------------------------------------------------------------------------------------------------------------------------------------------------------------------------------------------------------------|----------------------------------------------|---|---|---|
|              | Physical fitness                                                                                                                                                                                                                                                           | Six-minute walk test [36]; Borg scale [38]   | X | X | X |
|              | Blood pressure                                                                                                                                                                                                                                                             | Omron Digital Blood Pressure Monitor HEM-907 | X | X | X |
|              | Medication use                                                                                                                                                                                                                                                             | Participant questionnaire [39]               | X | X | X |
|              | Diabetes incidence                                                                                                                                                                                                                                                         | Participant questionnaire [39]               | X | X | X |
|              | Cardiovascular events                                                                                                                                                                                                                                                      | Participant questionnaire [32]               | X | X | X |
|              | Economic indicators<br>- health care use<br>- absence from work                                                                                                                                                                                                            | Participant questionnaire                    | X | X | X |
| Intermediate | Nutrient intake                                                                                                                                                                                                                                                            | Food Frequency Questionnaire [40, 41]        | X | X | X |
|              | Food intake behaviours<br>- eating 200 grams of fruit every day<br>- eating 200 grams of vegetables every day<br>- eating more whole grain bread<br>- eating less unhealthy snacks<br>- replacing fat bread spreads with lean bread spreads<br>- drinking less soft drinks | Food Frequency Questionnaire [40, 41]        | X | X | X |

Duijzer, G. *et al.* SLIMMER: A randomised controlled trial of diabetes prevention in Dutch primary health care: design and methods for process, effect, and economic evaluation

|         |                                                                                                                                                                                                                                       |                                                    |   |   |   |
|---------|---------------------------------------------------------------------------------------------------------------------------------------------------------------------------------------------------------------------------------------|----------------------------------------------------|---|---|---|
|         | Physical activity behaviour<br><ul style="list-style-type: none"> <li>- mode</li> <li>- frequency</li> <li>- duration</li> <li>- intensity</li> <li>- activity score</li> <li>- compliance to physical activity guidelines</li> </ul> | SQUASH [44]                                        | X | X | X |
|         | Sedentary behaviour                                                                                                                                                                                                                   | AQuAA [46]                                         | X | X | X |
|         | Social participation                                                                                                                                                                                                                  | Participant questionnaire                          |   | X | X |
| Initial | Behavioural determinants<br><ul style="list-style-type: none"> <li>- intention</li> <li>- attitude</li> <li>- social influences</li> <li>- self-efficacy</li> <li>- motivation</li> <li>- action control</li> <li>- skills</li> </ul> | Participant questionnaire (items based on [49-51]) | X | X | X |
| Outputs | Recruitment (procedures used to approach and attract                                                                                                                                                                                  | Project logbook                                    | X |   |   |

Duijzer, G. *et al.* SLIMMER: A randomised controlled trial of diabetes prevention in Dutch primary health care: design and methods for process, effect, and economic evaluation

|                                                                                                                                                    |                                                                          |   |   |   |
|----------------------------------------------------------------------------------------------------------------------------------------------------|--------------------------------------------------------------------------|---|---|---|
| participants at individual or organisational levels)                                                                                               |                                                                          |   |   |   |
| Reach (proportion of intended target audience that participated in an intervention)                                                                | Participant questionnaire, non-response survey, attendance lists         | X | X |   |
| Dose delivered (number of amount of intended units of each intervention or component delivered or provided by interventionists)                    | Registration forms                                                       | X | X | X |
| Dose received (extent to which participants actively engage with, interact with, are receptive to, and use materials or recommended resources)     | Participant questionnaire, registration forms, attendance lists          |   | X | X |
| Acceptability (extent to which participants and health care professionals are satisfied with the intervention)                                     | Participant questionnaire, semi-structured interviews with professionals |   | X | X |
| Implementation integrity (extent to which the intervention was implemented as planned)                                                             | Semi-structured interviews with professionals                            | X | X |   |
| Applicability (extent to which an intervention process could be implemented in the real-life setting)                                              | Semi-structured interviews with professionals                            | X | X |   |
| Context (aspects of the larger physical, social, and political environment that either directly or indirectly affects intervention implementation) | Participant questionnaire, semi-structured interviews with professionals | X | X | X |

Duijzer, G. *et al.* SLIMMER: A randomised controlled trial of diabetes prevention in Dutch primary health care: design and methods for process, effect, and economic evaluation

|          |                                                                                                                                                    |                                                       |   |   |   |
|----------|----------------------------------------------------------------------------------------------------------------------------------------------------|-------------------------------------------------------|---|---|---|
| Economic | Intervention costs<br>- personnel (practice nurses, dieticians, physiotherapists, providers of sports clinics, project coordinator)<br>- materials | Project logbook, registration forms, attendance lists | X | X | X |
|          | Patient costs (e.g. sports expenditures, time costs)                                                                                               | Participants questionnaire, registration forms        | X | X | X |
|          | Willingness-to-pay                                                                                                                                 | Participant questionnaire                             | X | X | X |

Duijzer, G. *et al.* SLIMMER: A randomised controlled trial of diabetes prevention in Dutch primary health care: design and methods for process, effect, and economic evaluation
